# Supplementary material for: Development of Colonic Organoids Containing Enteric Nerves or Blood Vessels from Human Embryonic Stem Cells
Source: PubMed Central journal article supplement (PMC7600593; doi:10.3390/cells9102209), 2020-09-29
Supplement: cells-09-02209-s001.pdf [file cells-09-02209-s001.pdf]

**Table S1.** Sequences of primers used in this study.

| <b>Genes</b> | <b>Forward (5'-3')</b>      | <b>Reverse (5'-3')</b>       |
|--------------|-----------------------------|------------------------------|
| 18S          | GGCCCTGTAATTGGAATG AG       | GCTATTGGAGCTGGAATTAC         |
| OCT4         | GGGGTCTATTTGGGAAGGTAT       | TGTTGTCAGCTTCCTCCACC         |
| NANOG        | CAGAAGGCCTCAGCACCTAC        | ATTGGAAGGTTCCCAGTCGG         |
| SOX17        | ACGCTTTCATGGTGTGGGCTAAG     | GTCAGCGCTTCCACGACTTG         |
| FOXA2        | CTTCAAGCACCTGCAGATTC        | AGACCTGGATTTACCCGTGT         |
| CDX2         | ACACCTTCTACAATGAGC          | ACGTCACACTTCATGATG           |
| KLF5         | GGTTGCACAAAAGTTTATAC        | GGCTTGGCGCCCGTGTGCTCC        |
| HOXA13       | AAATGTACTGCCCAAAGAGCA       | ATCCGAGGGATGGGAGACC          |
| HOXB13       | CCACTGGCTGCTGGACTGTT        | TATGACTGGGCCAGGTTCTTTG       |
| HOXD12       | TGTGTGAGCGCAGTCTCTACAGA     | CGGCCTCAGGTTGGAGAAG          |
| HOXD13       | CTGGGCTACGGCTACCACTTC       | GCGATGACTTGAGCGCATT          |
| SATB2        | CCACCTTCCCAGCTTGATT         | TTAGCCAGCTGGTGGAGACT         |
| LGR5         | CAGGGTCTTCACCTCTACC         | TGGGAATGTATGTCAGAGCG         |
| MUC2         | TGTAGGCATCGCTCTTCTCA        | GACACCATCTACCTCACCCG         |
| MUC3         | CCTCATGCAAACCTTCACTC        | AGCCACATTTTCTGTACTG          |
| MUC4         | CGCGGTGGTGGAGGCGTTCTT       | GAAGAATCTGACAGCCTTCA         |
| CHGA         | CGGTTTTGAAGATGAACTCTCAG     | GCTCTTCCACCGCCTCTT           |
| DEFA5        | ACCCAGAAGCAGTCTGGGGAAGA     | GGTGGCTCTTGCCTGAGAACCTGA     |
| CHGA         | CGGTTTTGAAGATGAACTCTCAG     | GCTCTTCCACCGCCTCTT           |
| VILLIN       | TAGCTGTGGTTGTAAAGCAGTACC    | GGTATCATCTTTCTGAAGGAATAGG    |
| NESTIN       | ATAGAGGGCAAAGTGGTAAGCAG     | TTCTAGTGTCTCATGGCTCTGGTT     |
| OTX2         | GACCACTTCGGGTATGGACT        | TGGACAAGGGATCTGACAGT         |
| ZIC1         | GTCCTACACGCATCCCAGTT        | GTCCTACACGCATCCCAGTT         |
| SOX10        | CTCACTGCCCTGATGACCCA        | CAGCCCCTCATCTTTCAGTGT        |
| FOXD3        | GACATGTTTCGACAACGGCAG       | CTGTAAGCGCCGAAGCTCTG         |
| NDRG4        | ATGCTTCCATCCACTCACC         | TTCCTGCTCTCTCCCGTTT          |
| TUJ1         | GAGGGAGATCGTGCACATCCAGG     | CGAGTCGCCCACGTAGTTGC         |
| EOMES        | ATCATTACGAAACAGGGCAGG C     | CGGGGTGGTATTTGTGTAAGG        |
| MIXL1        | ACGTCTTTCAGCGCCGAACAG       | TTGGTTCGGGCAGGCAGTTCA        |
| BRACHY       | GTGCTGTCCCAGGTGGCTTAC AGATG | CCTTAACAGCTCAACTCTAACTAC TTG |
| CD34         | TACACGAAAACGGTGGAGG         | TTTTCTGAGCCCCTCGGTTT         |

**Table S2.** Primary antibodies used in western blotting and immunofluorescence staining.

| <b>Primary antibody</b> | <b>Catalog number</b> | <b>Company</b> |
|-------------------------|-----------------------|----------------|
| SATB2                   | SC-81376              | Santacruz      |
| MUC4                    | SC-33654              | Santacruz      |
| DEFA5                   | SC-53997              | Santacruz      |
| VILLIN                  | SC-58897              | Santacruz      |
| CHGA                    | SC-393941             | Santacruz      |
| TUJ1                    | SC-51670              | Santacruz      |
| CD31                    | SC-376764             | Santacruz      |
| CD34                    | SC-7324               | Santacruz      |
| GAPDH                   | SC-47724              | Santacruz      |
| FOXA2                   | SC-374375             | Santacruz      |
| LGR5                    | MAB8078-SP            | R&D System     |
| SOX17                   | AF1924-SP             | R&D System     |

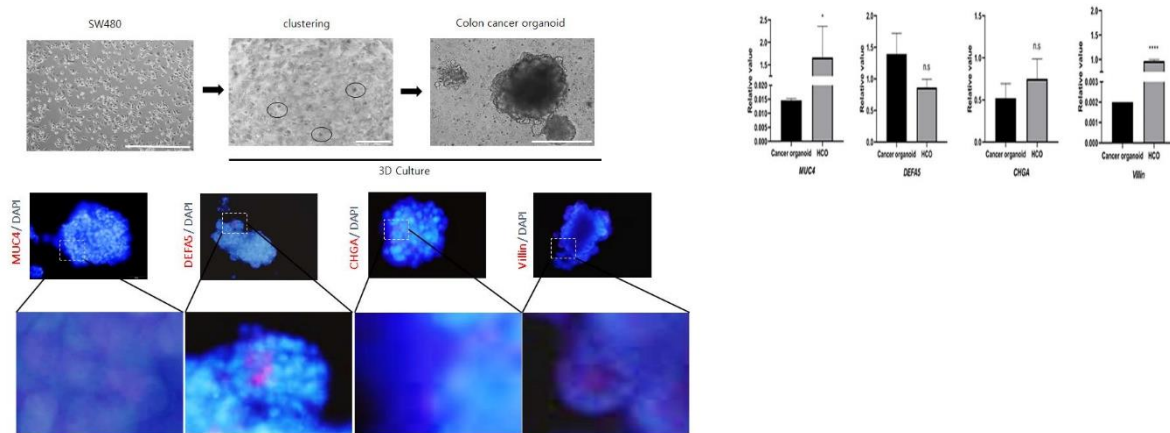

**Figure S1.** Morphology of colon cancer cells (cell line SW480) and development of colon cancer organoids (CCO). Expression of *MUC4*, *DEFA5*, *CHGA*, and *villin* of CCOs as detected via qRT-PCR and immunofluorescent staining. \* $p \leq 0.1$ , \*\* $p \leq 0.01$ , \*\*\* $p \leq 0.001$ , and \*\*\*\* $p \leq 0.0001$ . Scale bar, 200  $\mu\text{m}$ .

A.

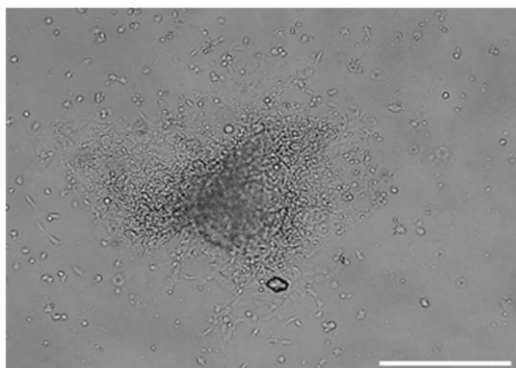

B.

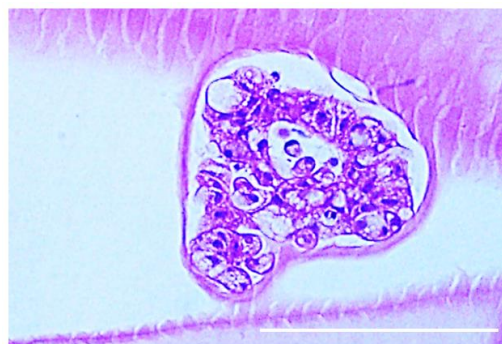

**Figure S2.** Morphology HCOs using the triple co-culture of HCOs, ENS and blood vessels. (A): Bright-field microscopy of HCOs after 7 days of triple co-culture. (B): H&E staining of HCOs after 7 days of triple co-culture. The scale bars indicate 200  $\mu\text{m}$ .
